# Supplementary material for: Loss of Vascular Endothelial Glutaminase Inhibits Tumor Growth and Metastasis, and Increases Sensitivity to Chemotherapy
Source: Oxford University Press journal article supplement (doi:10.1158/2767-9764.crc-22-0048), 2022-06-29
Supplement: crc-22-0048-s02.pdf [file crc-22-0048-s02.pdf]

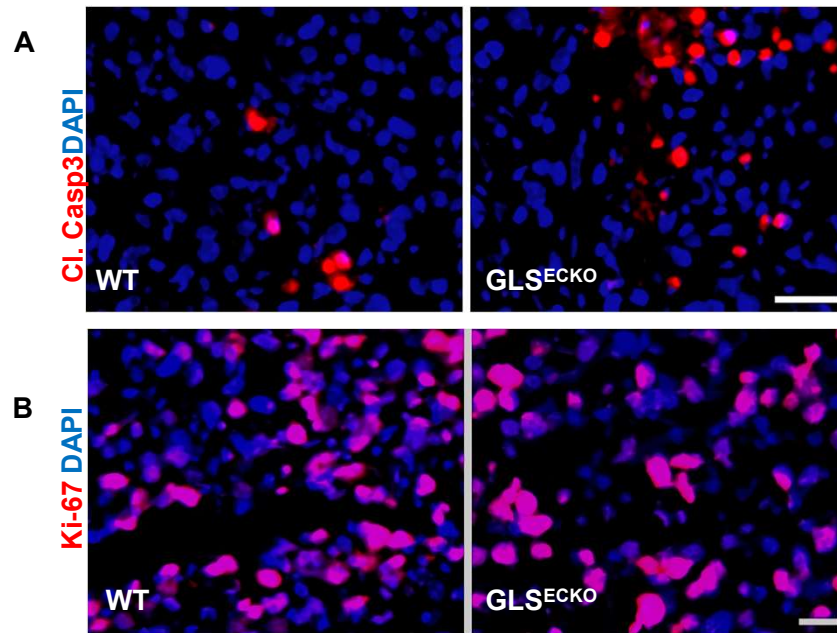

**Supplementary Fig. S1: Loss of GLS in the endothelium increases apoptosis but not cell proliferation.** (A) Representative immunofluorescence images of cleaved-caspase 3 (red) and DAPI (blue) in WT versus GLS<sup>ECKO</sup> tumors. Scale bar: 50  $\mu$ m. (B) Representative immunofluorescence images of Ki-67 (red) and DAPI (blue) in WT versus GLS<sup>ECKO</sup> tumors. Scale bar: 20  $\mu$ m.
