# Supplementary material for: Loss of Vascular Endothelial Glutaminase Inhibits Tumor Growth and Metastasis, and Increases Sensitivity to Chemotherapy
Source: Oxford University Press journal article supplement (doi:10.1158/2767-9764.crc-22-0048), 2022-06-29
Supplement: crc-22-0048-s03.pdf [file crc-22-0048-s03.pdf]

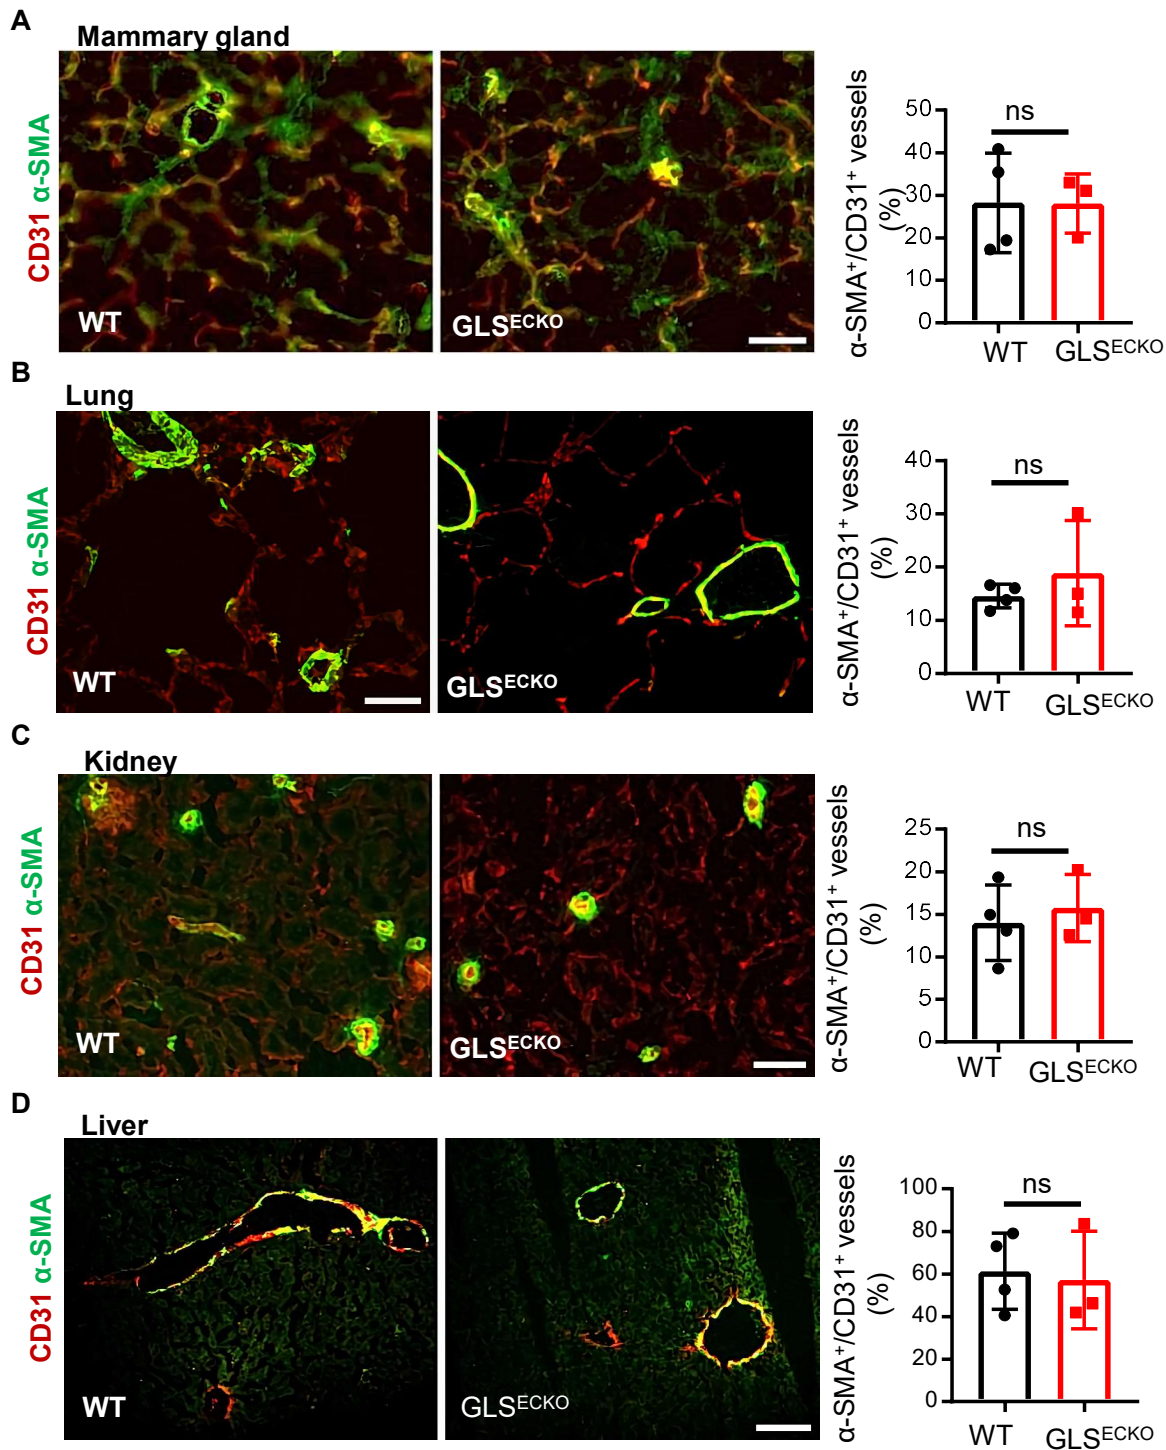

**Supplementary Fig. S2: Loss of GLS in tumor-free endothelium does not affect the vasculature of adult animals.** WT and GLS<sup>ECKO</sup> mice were treated with tamoxifen for 5 consecutive days to induce EC-specific loss of GLS. One week following the last tamoxifen treatment, the mammary gland (A), Lungs (B), Kidneys (C) and Liver (D) were harvested and co-stained with CD31 (red) and α-SMA (green) to assess vascular integrity. n=3-4 mice per group. Scale bar: 50 μm (A, B, C) and 100 μm (D).
