# Supplementary material for: Loss of Vascular Endothelial Glutaminase Inhibits Tumor Growth and Metastasis, and Increases Sensitivity to Chemotherapy
Source: Oxford University Press journal article supplement (doi:10.1158/2767-9764.crc-22-0048), 2022-06-29
Supplement: crc-22-0048-s05.pdf [file crc-22-0048-s05.pdf]

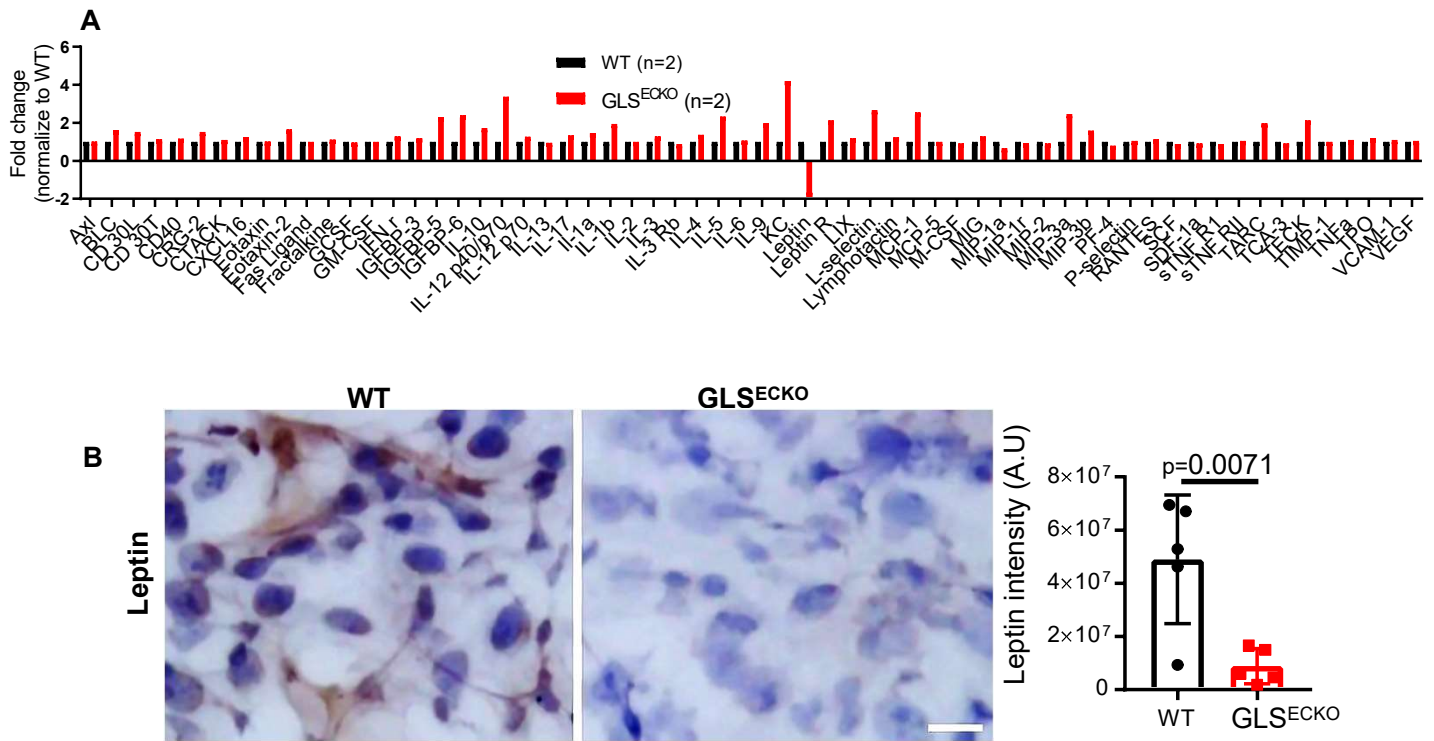

**Supplementary Fig. S4:** (A) Cytokine array showing differentially expressed proteins in WT versus GLS<sup>ECKO</sup> tumor lysates, including Leptin and Leptin receptor. (B) Representative immunohistochemistry images and quantification showing decrease leptin expression in tumor sections of GLS<sup>ECKO</sup> compared to WT. n=5 mice per group. Scale bar: 50  $\mu$ m
