# Supplementary material for: Loss of Vascular Endothelial Glutaminase Inhibits Tumor Growth and Metastasis, and Increases Sensitivity to Chemotherapy
Source: Oxford University Press journal article supplement (doi:10.1158/2767-9764.crc-22-0048), 2022-06-29
Supplement: crc-22-0048-s06.pdf [file crc-22-0048-s06.pdf]

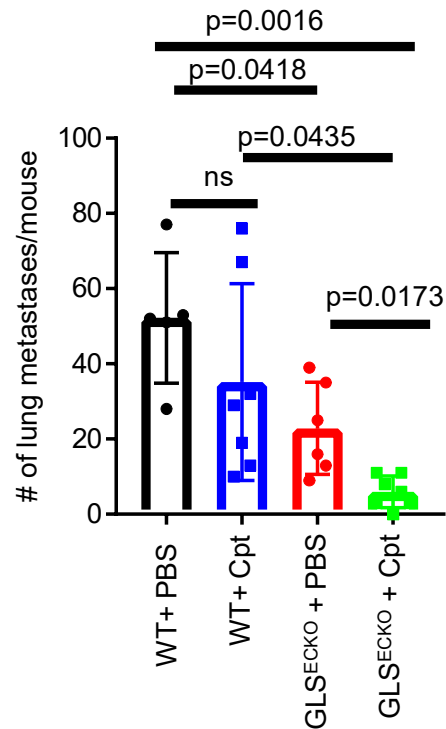

**Supplementary Fig. S5 : Quantification of lung metastases in WT or GLS<sup>ECKO</sup> mice treated with Cisplatin** Tumor implantation and cisplatin treatment are as Figure 5. At the end of studies, lungs were harvested and metastases in lung were quantified in 5 sections/mouse (n=6-7 mice/group). \*\* $P \leq 0.01$ . \* $P \leq 0.05$ . one-way ANOVA with Dunnett's correction. ns: not significant.
